# Supplementary material for: First and second trimester urinary metabolic profiles and fetal growth restriction: an exploratory nested case-control study within the infant development and environment study
Source: Springer Nature journal article supplement (doi:10.1186/s12884-018-1674-8), 2018-02-08
Supplement: MOESM1 [file 15448738]

# ● Analysis Report Urine-Screening

Sample: **5\_pool1.100000.10r**

Measuring Date: 01-Apr-2016 03:53:05

Reporting Date: 01-Apr-2016 11:02:26

Analysis Version: 0.3

Number of Pages: 3

Sample Receiving Date: \_\_\_\_\_

Comment: \_\_\_\_\_  
 \_\_\_\_\_  
 \_\_\_\_\_  
 \_\_\_\_\_

### Disclaimer

RESEARCH USE ONLY: This is no clinical diagnostic analysis report. Must not be used for clinical (medical or IVD) diagnosis or for patient management!

### General Remarks

A list of 26 metabolites is quantified automatically from the spectroscopic data. Metabolite concentrations given in mmol/L and mmol/mol creatinine are compiled in the second and third column, respectively.

The limits of detection (LOD) are not yet available and replaced with the labeling 'N.A.'. LODs will be provided in future releases.

| Compound | Concentration |               | LOD           |
|----------|---------------|---------------|---------------|
|          | mmol/L        | mmol/mol Crea | mmol/mol Crea |
|          |               |               |               |

## Targeted Analysis (Quantification)

### Standard Compounds

| Compound             | Concentration <sup>1</sup> |               | LOD           |
|----------------------|----------------------------|---------------|---------------|
|                      | mmol/L                     | mmol/mol Crea | mmol/mol Crea |
| Creatinine           | 8.2                        |               |               |
| Creatine             | 0.97                       | 119           | N.A.          |
| D-Glucose-beta       | 0.24                       | 29            | N.A.          |
| Alanine              | 0.46                       | 56            | N.A.          |
| Lactic Acid          | 0.71                       | 87            | N.A.          |
| Acetic Acid          | 0.10                       | 12            | N.A.          |
| Succinic Acid        | 0.17                       | 21            | N.A.          |
| Citric Acid          | 3.51                       | 428           | N.A.          |
| Dimethylamine        | 0.24                       | 29            | N.A.          |
| Trimethylamine       | 0.03                       | 3             | N.A.          |
| Betaine              | 0.17                       | 21            | N.A.          |
| Glycine              | 2.56                       | 313           | N.A.          |
| Fumaric Acid         | 0.01                       | 1             | N.A.          |
| Formic Acid          | 0.17                       | 20            | N.A.          |
| 1-Methylnicotinamide | 0.11                       | 13            | N.A.          |
| N,N-Dimethylglycine  | 0.04                       | 5             | N.A.          |
| Trigonelline         | 0.09                       | 11            | N.A.          |
| Hippuric Acid        | 1.57                       | 191           | N.A.          |

<sup>1</sup>Please take notice of the general remarks and the annotations mentioned on the cover page.

## Non-Standard Compounds

| Compound                | Concentration <sup>1</sup> |               | LOD           |
|-------------------------|----------------------------|---------------|---------------|
|                         | mmol/L                     | mmol/mol Crea | mmol/mol Crea |
| D-Lactose               | 0.45                       | 55            | N.A.          |
| Paracetamol             | 0.01                       | 1             | N.A.          |
| Paracetamol-glucuronide | 0.00                       | 0             | N.A.          |
| Acetone                 | 0.05                       | 6             | N.A.          |
| 3-Hydroxybutyric Acid   | 0.00                       | 0             | N.A.          |
| Acetoacetic Acid        | 0.18                       | 22            | N.A.          |
| Benzoic Acid            | 0.03                       | 3             | N.A.          |
| Ethanol                 | 0.00                       | 0             | N.A.          |

<sup>1</sup>Please take notice of the general remarks and the annotations mentioned on the cover page.
